# Supplementary material
Source: publisher figshare collection journal article supplement (https://sage.figshare.com/ndownloader/files/15592568)
Supplement: Supplementary file 1 [file 15592568]

**Table S6: Enriched pathways (MetaboAnalyst) using all the significant altered metabolites (targeted a**  
the significant enriched pathways in resistant PDXs ( $p < 0.05$ ,  $FDR < 0.05$ ) are highlighted **in red**.

and untargeted metabolomics approaches)
